# Supplementary material for: What Is Trophoblast? A Combination of Criteria Define Human First-Trimester Trophoblast
Source: PubMed Central journal article supplement (PMC4750161; doi:10.1016/j.stemcr.2016.01.006), 2016-02-09
Supplement: mmc1.pdf [file mmc1.pdf]

**Stem Cell Reports, Volume 6**

**Supplemental Information**

**What Is Trophoblast? A Combination of Criteria Define Human First--  
Trimester Trophoblast**

**Cheryl Q.E. Lee, Lucy Gardner, Margherita Turco, Nancy Zhao, Matthew J. Murray, Nicholas Coleman, Janet Rossant, Myriam Hemberger, and Ashley Moffett**

A)

Donor 1

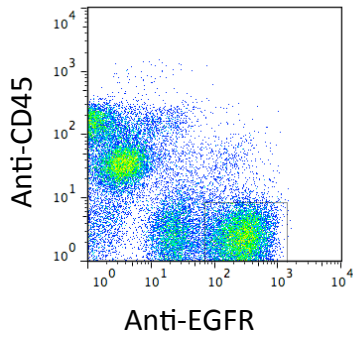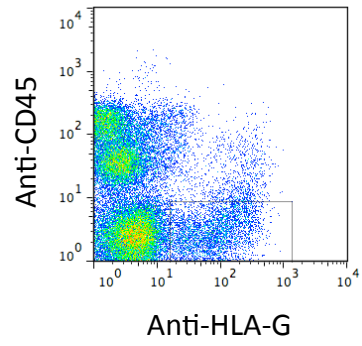

Donor 2

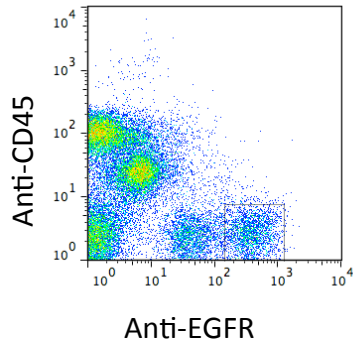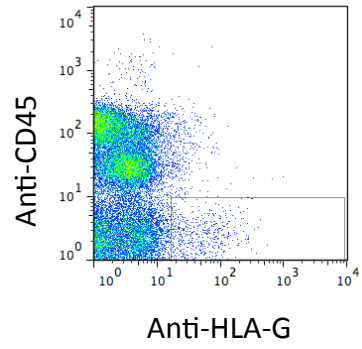

B)

M25

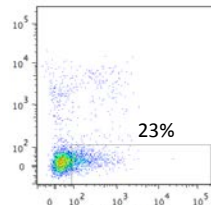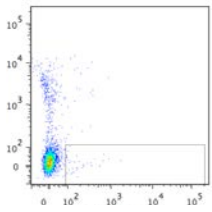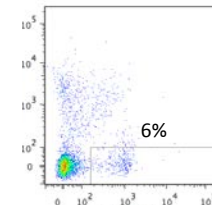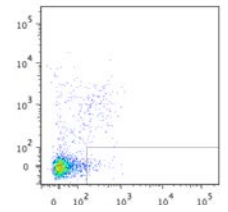

Anti-KRT7

Isotype control

Anti-CD45

Isotype control

M26

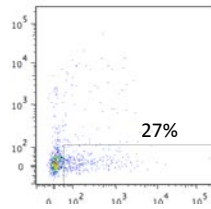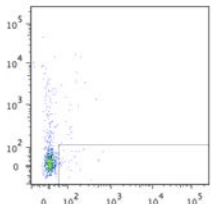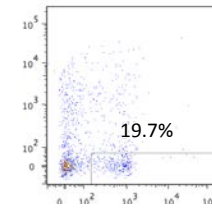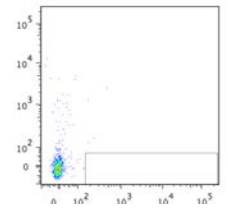

Anti-KRT7

Isotype control

Anti-CD45

Isotype control

M27

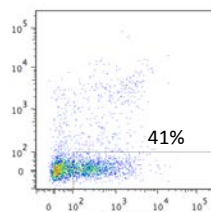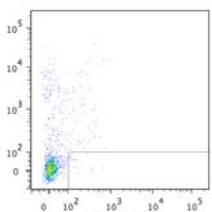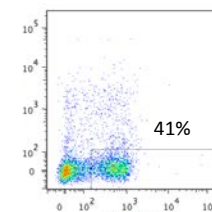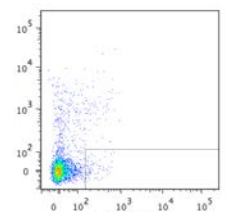

Anti-KRT7

Isotype control

Anti-CD45

Isotype control

Live/dead marker

A)

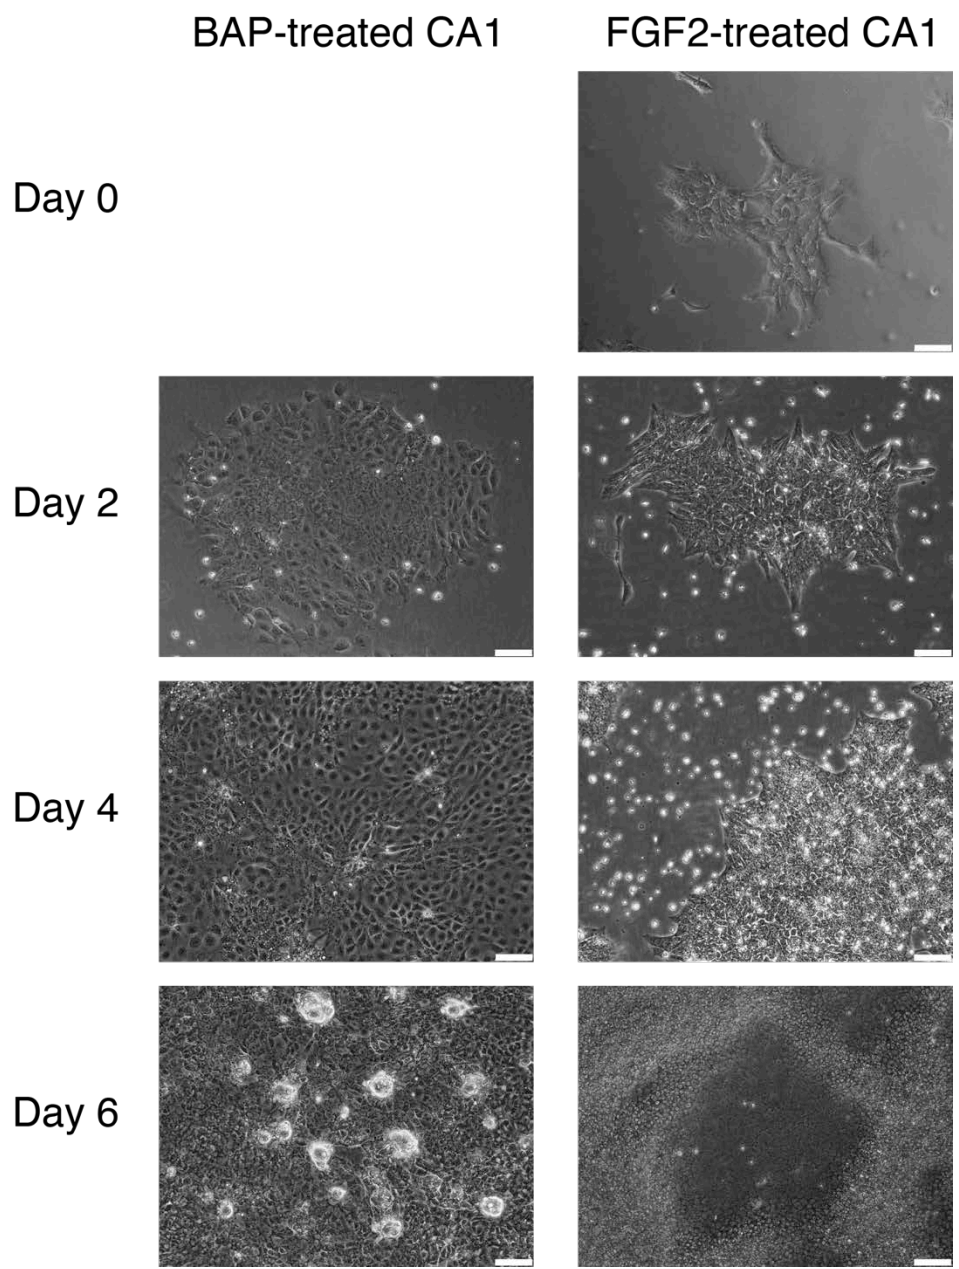

B)

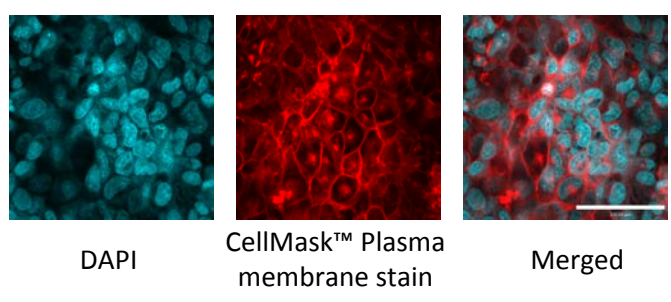

C)

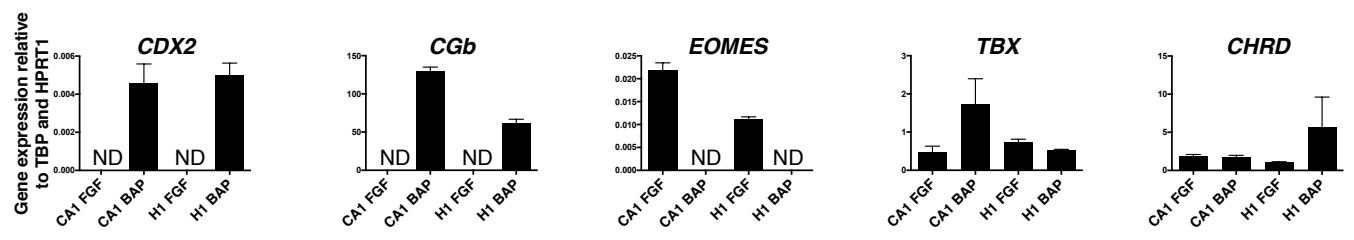

**Figure S1.** FACS plots for the primary tissues utilised. **Related to Figure 1.** (A) EGFR<sup>+</sup> VCT and HLA-G<sup>+</sup> EVT are isolated from the CD45<sup>-</sup> population using flow cytometry and lysed immediately for bisulphite sequencing. (B) Percentages of leukocytes and trophoblast in the donor samples lysed for miRNA analysis. As leukocytes are negative for C19MC miRNAs, they do not contribute to the C19MC miRNAs in the samples.

**Figure S2. BAP-treated hESC cells form aggregates. Related to Figure 4.** (A) Aggregates of CA1 hESC form over six days of treatment with BAP but not with FGF2. (White line: scale bar for 100 µm) (B) A membrane dye shows cells in the aggregates are mononuclear (N=3). (White line: scale bar for 100 µm) (C) qRT-PCR of *CDX2*, *CGB*, *EOMES*, *TBX* and *CHRD* shows similar findings as reported in Amita et al. (2013)(N=3).

Table S1. Expression pattern of mouse TSC genes in human and mouse tissues. Related to Tables 1 & 2.

| Gene   | Human embryos                                           | Human chorionic villi                                                                        | Somatic human tissues (examples given)                                                                                                                                                                                | Somatic mouse tissues (examples given)                                                                                                                                                                                                                                                                                                    |
|--------|---------------------------------------------------------|----------------------------------------------------------------------------------------------|-----------------------------------------------------------------------------------------------------------------------------------------------------------------------------------------------------------------------|-------------------------------------------------------------------------------------------------------------------------------------------------------------------------------------------------------------------------------------------------------------------------------------------------------------------------------------------|
| KRT7   | In TE only<br>(Niakan and Eggan, 2012)                  | All trophoblast<br>(Muhlhauser et al., 1995; Blaschitz et al., 2000)                         | Epithelium<br>(Ramaekers et al., 1987; Taylor-Papadimitriou et al., 1989; Bai et al., 2008)                                                                                                                           | Epithelium<br>(F. J. Smith et al., 2002)                                                                                                                                                                                                                                                                                                  |
| GATA3  | Upregulated in TE compared to ESC<br>(Bai et al., 2012) | All trophoblast except ST                                                                    | Endoderm, mesoderm, hematopoietic cells, mammary gland, kidney, skin, neural cells, inner ear<br>(Labastie et al., 1995; Debacker et al., 1999; Lantelme et al., 2001; Usary et al., 2004; Sellheyer and Krahl, 2010) | Hematopoietic cells, eye, adrenal glands, kidneys, brain, neural cells, inner ear, hair follicles, thymus, skin and mammary gland<br>(George et al., 1994; E. Smith et al., 2002; Kaufman et al., 2003; Lawoko-Kerali et al., 2004; de Guzman Strong et al., 2006; Kouros-Mehr et al., 2006; Asselin-Labat et al., 2007; Ho et al., 2009) |
| TFAP2C | Upregulated in TE compared to ESC<br>(Bai et al., 2012) | All trophoblast except ST<br>(Kuckenberget al., 2010; Biadasiewicz et al., 2011)             | Skin, mammary gland<br>(Oyama et al., 2002; Friedrichs et al., 2007)                                                                                                                                                  | Ectoderm, epithelial cells, neural crest, mesenchymal cells, germ cells, eye<br>(Mitchell et al., 1991; Chazaud et al., 1996; Oyama et al., 2002; Weber et al., 2010; Bassett et al., 2012)                                                                                                                                               |
| CDX2   | Starts at dpf 5 in TE only<br>(Niakan and Eggan, 2012)  | Some VCT and EVT<br>(Hemberger et al., 2010)                                                 | Intestine, pancreatic duct<br>(Silberg et al., 2000; Moskaluk et al., 2003; Xiao et al., 2014)                                                                                                                        | Ectoderm, mesoderm, neural cells, intestine<br>(Suh et al., 1994; Beck et al., 1995; Silberg et al., 2000)                                                                                                                                                                                                                                |
| EOMES  | Not known                                               | Not known                                                                                    | Hematopoietic cells<br>(McLane et al., 2013)                                                                                                                                                                          | Mesoderm, primitive streak, visceral endoderm, hematopoietic cells, neural cells<br>(Ciruna and Rossant, 1999; Gordon et al., 2012)                                                                                                                                                                                                       |
| ELF5   | Not known                                               | VCT and some EVT at the base of the cytotrophoblast cell columns<br>(Hemberger et al., 2010) | Salivary gland, prostate and kidney, trachea and mammary gland<br>(Oettgen et al., 1999)                                                                                                                              | Mammary gland, lung, epithelium, hair follicle<br>(Lapinskas et al., 2004; Metzger et al., 2007; Choi et al., 2008, 2009; Oakes et al., 2008)                                                                                                                                                                                             |
| TEAD4  | Not known                                               | Not known                                                                                    | Skeletal muscle, pancreas, kidney, heart, endothelial cells<br>(Stewart et al., 1996; Appukuttan et al., 2007)                                                                                                        | In whole early conceptus (7.5-8.5 dpc), myotome, eye, lung, liver, salivary gland, nasal gland epithelia, small intestine, decidua<br>(Jacquemin et al., 1996; Appukuttan et al., 2007; Ribas et al., 2011)                                                                                                                               |
| SOX2   | Not known                                               | Not known                                                                                    | Pituitary, forebrain, eye, pancreas<br>(Zhao et al., 2007; Kelberman et al., 2008)                                                                                                                                    | ESC, neural cells, gut endoderm, trachea, lung, pituitary gland, tongue, inner ear<br>(Wood and Episkopou, 1999; Ellis et al., 2004; Okubo et al., 2006; Fauquier et al., 2008; Que et al., 2009; Adachi et al., 2013)                                                                                                                    |

Table S2. Summary results for the characterisation of 2102Ep and BAP-treated hESC<sup>1</sup>. Related to Fig 4 & 5.

| Trophoblast markers     |        | Trophoblast    | JEG3           | 2102Ep          | hESC            | BAP-treated hESC |            |
|-------------------------|--------|----------------|----------------|-----------------|-----------------|------------------|------------|
|                         |        |                |                |                 |                 | Flat cells       | Aggregates |
| Protein markers         | KRT7   | +              | +              | -               | -               | +                | +          |
|                         |        | [1], [2]       |                |                 | [3]-[6]         |                  |            |
|                         | TFAP2C | +              | +              | +               | -               | Very weak        | ++         |
|                         | GATA3  | +              | +              | -               | Very weak/ -    | +                | ++         |
|                         |        |                |                |                 | [7]             |                  |            |
| HLA class I expression  | HLA-A  | -              | -              | +               | +               |                  | +          |
|                         |        | [8]            |                |                 | [9], [10]       |                  |            |
|                         | HLA-B  | -              | -              | +               | -               |                  | +          |
|                         |        | [8]            |                |                 | [10]            |                  |            |
|                         | HLA-G  | + (EVT only)   | +              | -               | - (debatable)   |                  | -          |
|                         |        | [8]            |                |                 | [11]-[14]       |                  |            |
| <i>ELF5</i> methylation |        | Hypomethylated | Hypomethylated | Hypermethylated | Hypermethylated | Hypomethylated   |            |
|                         |        |                | [15]           |                 | [15]            |                  |            |
| miRNAs                  | C19MC  | ++++           | ++++           | ++              | ++              |                  | +          |
|                         |        | [16]           |                |                 | [17]-[19]       |                  |            |

+ / +++ => Level of expression - => No expression

<sup>1</sup> References are numbered in table and listed below:

[1] (Blaschitz et al., 2000) [2] (Haigh et al., 1999)

[6] (Amita et al., 2013) [7] (Levenberg et al., 2002)

[11] (Verloes et al., 2011) [12] (Hiby et al., 1999)

[16] (Donker et al., 2012) [17] (Ren et al., 2009)

[3] (Harun et al., 2006)

[8] (Apps et al., 2009)

[13] (Jurisicova et al., 1996)

[18] (Laurent et al., 2008)

[4] (Niakan and Eggan, 2012)

[9] (Basak et al., 2009)

[14] (Yao et al., 2005)

[19] (Cao et al., 2008)

[5] (Udayashankar et al., 2011)

[10] (Sabir et al., 2013)

[15] (Hemberger et al., 2010)

## SUPPLEMENTAL EXPERIMENTAL PROCEDURES

### Culture conditions for cell lines

All except hESCs had antibiotics added.

| Cell lines       | Cell type                                                                               | Medium used                                                                                                                                                                                                                         |
|------------------|-----------------------------------------------------------------------------------------|-------------------------------------------------------------------------------------------------------------------------------------------------------------------------------------------------------------------------------------|
| JEG-3            | Choriocarcinoma (Kohler and Bridson, 1971; Kohler et al., 1971)                         | DMEM (high glucose), 10% FCS, 2 mM L-glutamine                                                                                                                                                                                      |
| JAR              | Choriocarcinoma (Pattillo et al., 1971)                                                 | RPMI-1640, 10% FCS, 2 mM L-glutamine                                                                                                                                                                                                |
| 2102Ep,<br>1411H | Embryonal carcinoma (Andrews et al., 1982),<br>Yolk sac tumour (Vogelzang et al., 1985) | DMEM (GlutaMAX™-I, without sodium pyruvate), 10% FCS, 2 mM L-glutamine                                                                                                                                                              |
| TCAM2,<br>NCCIT  | Seminoma (Mizuno et al., 1993),<br>Embryonal carcinoma (Teshima et al., 1988)           | RPMI-1640, 10% FCS                                                                                                                                                                                                                  |
| GCT44            | Yolk sac tumour (Pera et al., 1989)                                                     | DMEM (GlutaMAX™-I, with sodium pyruvate), 10% FCS                                                                                                                                                                                   |
| CA1, H1          | Embryonic stem cell (Thomson et al., 1998; Adewumi et al., 2007)                        | For maintenance: mTeSR™1<br>For differentiation assays*:<br>80% KNOCKOUT-DMEM, 20% KNOCKOUT serum replacement, 1 mM L-glutamine, 0.1 mM β-mercaptoethanol, 1% nonessential amino acids (conditioned by mouse embryonic fibroblasts) |

\*Media were supplemented with either 10 ng/mL BMP4, 1 μM A83-01 (Focus Biomolecules, #10-1327) and 0.1 μM PD173074 (AdooQ, #A10703) or 4 ng/mL FGF2 and matched amount of DMSO.

### Differentiation protocol for hESC

The hESC were routinely maintained on matrigel-coated plates in mTeSR™1 and passaged at 1:8 every five to six days. For differentiation, cells were plated at 12000 cells/cm<sup>2</sup> in mTeSR™1, as per Amita et al. (2013). The next day, the cells were cultured in mouse embryonic fibroblast-conditioned media supplemented with 4 ng/mL FGF2 for 24 hours, before they were switched to BAP-containing medium (Day 0). The controls were cultured in FGF2. The cells were harvested for analysis on Day 6.

### Primers for qRT-PCR of miRNA

| miRNA       | RT primer                                                 | Forward primer                |
|-------------|-----------------------------------------------------------|-------------------------------|
| miR-103a    | <i>GTTGGCTCTGGTGCAGGGTCCGAGGTATTCGCACCAGAGCCAACTCATAG</i> | <i>GTAGCAGCATTGTACAGGG</i>    |
| miR-526b-3p | <i>GTTGGCTCTGGTGCAGGGTCCGAGGTATTCGCACCAGAGCCAACGCCTCT</i> | <i>GTTTGGGAAAGTGCTTCCTTTT</i> |
| miR-517a    | <i>GTTGGCTCTGGTGCAGGGTCCGAGGTATTCGCACCAGAGCCAACACACTC</i> | <i>GTTTGGATCGTGCATCCTTTA</i>  |
| miR-517b    | <i>GTTGGCTCTGGTGCAGGGTCCGAGGTATTCGCACCAGAGCCAACAGACAG</i> | <i>GTGCCTCTAGATGGAAGCA</i>    |
| miR-525-3p  | <i>GTTGGCTCTGGTGCAGGGTCCGAGGTATTCGCACCAGAGCCAACCGCTCT</i> | <i>GTTGAAGGCGCTTCCTTT</i>     |

Universal reverse primer: *GTGCAGGGTCCGAGGT*

### Primers for qRT-PCR of mRNA

| Gene   | Forward primer                  | Reverse primer                   |
|--------|---------------------------------|----------------------------------|
| CDX2   | <i>GGAACCTGTGCGAGTGGAT</i>      | <i>TCGATATTGTCTTTCGTCCTG</i>     |
| CGb    | <i>GCTACTGCCCCACCATGACC</i>     | <i>ATGGACTCGAAGCGCACATC</i>      |
| CHRD   | <i>CTGCCAAGTCACTCAGGTCA</i>     | <i>CTGATTCATTTTCAGCTCTCCC</i>    |
| ELF5   | <i>GACGCTGAAGAAAGCAAGGC</i>     | <i>CCCATTCCAGAATGCCACAG</i>      |
| EOMES  | <i>GTGCCCACGTCTACCTGTG</i>      | <i>CCTGCCCTGTTTCGTAATGAT</i>     |
| GATA3  | <i>TGCAGGAGCAGTATCATGAAGCCT</i> | <i>GCATCAAACAACCTGTGGCCAGTGA</i> |
| HPRT1  | <i>GACCAGTCAACAGGGGACAT</i>     | <i>CTTGCGACCTTGACCATCTT</i>      |
| NANOG  | <i>TGATTTGTGGGCCTGAAGAAA</i>    | <i>GAGGCATCTCAGCAGAAGACA</i>     |
| POU5F1 | <i>CGAAAGAGAAAGCGAACCAG</i>     | <i>AACCACACTCGGACCACATC</i>      |
| TBP    | <i>GAGCTGTGATGTGAAGTTTCC</i>    | <i>TCTGGGTTTGATCATTCTGTAG</i>    |
| TBX6   | <i>TGGGGGAGCGTGTGAGAAT</i>      | <i>CCGCTTTAATTGTGTGATTGGAC</i>   |
| TFAP2C | <i>TGCACGATCAGACAGTCATT</i>     | <i>GTAGAGCTGAGGAGCGACAATC</i>    |



### Antibodies used for flow cytometry

| Antigen     | Clone      | Vol added ( $\mu\text{L}$ ) / 100 $\mu\text{L}$ | Brand               | Cat number  |
|-------------|------------|-------------------------------------------------|---------------------|-------------|
| CD45        | 2D1        | 7.5                                             | R&D                 | FAB1430A    |
| KRT7        | LP5K       | 2.5                                             | Millipore           | CBL194F     |
| KRT7        | OVTL 12/30 | 0.7                                             | DAKO                | M701801-2   |
| EGFR        | ICR10      | 5                                               | GeneTex             | GTX11400    |
| HLA-G       | G233       | 1                                               | (Loke et al., 1997) |             |
| HLA-G       | MEM-G/9    | 5                                               | AbD Serotec         | MCA2044F    |
| HLA-A2      | BB7.2      | 0.1                                             | BD                  | 551230      |
| HLA-B7      | BB7.1      | 7                                               | Millipore           | MAB1288     |
| HLA-Bw6     | REA143     | 3                                               | Miltenyi Biotec     | 130-099-843 |
| HLA class I | W6/32      | 0.5                                             | AbCAM               | ab7855      |

### Primary antibodies used for immuno-staining

| Antigen | Clone      | Vol added ( $\mu\text{L}$ ) / 100 $\mu\text{L}$ | Brand      | Cat number |
|---------|------------|-------------------------------------------------|------------|------------|
| GATA3   | Polyclonal | 2                                               | R&D        | AF2605     |
| KRT7    | LP5K       | 2                                               | Millipore  | CBL194F    |
| KRT7    | OVTL 12/30 | 1                                               | DAKO       | M701801-2  |
| TFAP2C  | Polyclonal | 1                                               | R&D        | AF5059     |
| TFAP2C  | Polyclonal | 1                                               | Santa Cruz | 31935      |

### Membrane staining of BAP-treated hESC

To assess whether the aggregates are mononuclear, we employed a membrane dye CellMask™ Orange Plasma membrane stain (Life Technologies #C10045). Cells were incubated for 15 min in the staining solution (1:1000 stain in media) at 37°C, washed in media and imaged immediately.

### Quantification of aggregate formation efficiency

To determine the percentage of BAP-treated cells that are aggregates, 8 mm coverslips were stained for nucleus (DAPI) and TFAP2C, and at least half of each coverslip was imaged with an epifluorescent microscope. The area for DAPI and TFAP2C was quantified by ImageJ (Schneider et al., 2012). N = 6

## SUPPLEMENTAL REFERENCES

- Adachi, K., Nikaido, I., Ohta, H., Ohtsuka, S., Ura, H., Kadota, M., Wakayama, T., Ueda, H.R., Niwa, H., 2013. Context-dependent wiring of sox2 regulatory networks for self-renewal of embryonic and trophoblast stem cells. *Mol. Cell* 52, 380–92. doi:10.1016/j.molcel.2013.09.002
- Adewumi, O. et al., 2007. Characterization of human embryonic stem cell lines by the International Stem Cell Initiative. *Nat. Biotechnol.* 25, 803–816. doi:10.1038/nbt1318
- Amita, M., Adachi, K., Alexenko, A.P., Sinha, S., Schust, D.J., Schulz, L.C., 2013. Complete and unidirectional conversion of human embryonic stem cells to trophoblast by BMP4. *Proc. Natl. Acad. Sci. U. S. A.* 110, E1212–E1221. doi:10.1073/pnas.1303094110/-/DCSupplemental.www.pnas.org/cgi/doi/10.1073/pnas.1303094110
- Andrews, P.W., Goodfellow, P.N., Shevinsky, L.H., Bronson, D.L., Knowles, B.B., 1982. Cell-surface antigens of a clonal human embryonal carcinoma cell line: morphological and antigenic differentiation in culture. *Int. J. cancer* 29, 523–31.
- Apps, R., Murphy, S.P., Fernando, R., Gardner, L., Ahad, T., Moffett, A., 2009. Human leucocyte antigen (HLA) expression of primary trophoblast cells and placental cell lines, determined using single antigen beads to characterize allotype specificities of anti-HLA antibodies. *Immunology* 127, 26–39. doi:10.1111/j.1365-2567.2008.03019.x
- Appukuttan, B. et al., 2007. Identification of novel alternatively spliced isoforms of RTEF-1 within human ocular vascular endothelial cells and murine retina. *Invest. Ophthalmol. Vis. Sci.* 48, 3775–82. doi:10.1167/iovs.06-1172
- Asselin-Labat, M.-L. et al., 2007. Gata-3 is an essential regulator of mammary-gland morphogenesis and luminal-cell differentiation. *Nat. Cell Biol.* 9, 201–9. doi:10.1038/ncb1530
- Bai, M. et al., 2008. Immunohistochemical expression patterns of neural and neuroendocrine markers, the neural growth factor receptors and the beta-tubulin II and IV isotypes in human thymus. *Anticancer Res.* 28, 295–303.
- Bai, Q., Assou, S., Haouzi, D., Ramirez, J.-M., Monzo, C., Becker, F., Gerbal-Chaloin, S., Hamamah, S., De Vos, J., 2012. Dissecting the first transcriptional divergence during human embryonic development. *Stem Cell Rev.* 8, 150–62. doi:10.1007/s12015-011-9301-3
- Basak, G.W., Yasukawa, S., Alfaro, A., Halligan, S., Srivastava, A.S., Min, W.-P., Mineev, B., Carrier, E., 2009. Human embryonic stem cells hemangioblast express HLA-antigens. *J. Transl. Med.* 7, 27. doi:10.1186/1479-5876-7-27
- Bassett, E.A., Korol, A., Deschamps, P.A., Buettner, R., Wallace, V.A., Williams, T., West-Mays, J.A., 2012. Overlapping expression patterns and redundant roles for AP-2 transcription factors in the developing mammalian retina. *Dev. Dyn.* 241, 814–29. doi:10.1002/dvdy.23762
- Beck, F., Erler, T., Russell, A., James, R., 1995. Expression of Cdx-2 in the mouse embryo and placenta: possible role in patterning of the extra-embryonic membranes. *Dev. Dyn.* 204, 219–27. doi:10.1002/aja.1002040302
- Biadasiewicz, K., Sonderegger, S., Haslinger, P., Haider, S., Saleh, L., Fiala, C., Pollheimer, J., Knöfler, M., 2011. Transcription factor AP-2 $\alpha$  promotes EGF-dependent invasion of human trophoblast. *Endocrinology* 152, 1458–69. doi:10.1210/en.2010-0936
- Blaschitz, A., Weiss, U., Dohr, G., Desoye, G., 2000. Antibody reaction patterns in first trimester placenta: implications for trophoblast isolation and purity screening. *Placenta* 21, 733–41.

- Cao, H., Yang, C., Rana, T.M., 2008. Evolutionary emergence of microRNAs in human embryonic stem cells. *PLoS One* 3, e2820. doi:10.1371/journal.pone.0002820
- Chazaud, C., Oulad-Abdelghani, M., Bouillet, P., Décimo, D., Chambon, P., Dollé, P., 1996. AP-2.2, a novel gene related to AP-2, is expressed in the forebrain, limbs and face during mouse embryogenesis. *Mech. Dev.* 54, 83–94.
- Choi, Y.S., Chakrabarti, R., Escamilla-Hernandez, R., Sinha, S., 2009. Elf5 conditional knockout mice reveal its role as a master regulator in mammary alveolar development: failure of Stat5 activation and functional differentiation in the absence of Elf5. *Dev. Biol.* 329, 227–41. doi:10.1016/j.ydbio.2009.02.032
- Choi, Y.S., Cheng, J., Segre, J., Sinha, S., 2008. Generation and analysis of Elf5-LacZ mouse: unique and dynamic expression of Elf5 (ESE-2) in the inner root sheath of cycling hair follicles. *Histochem. Cell Biol.* 129, 85–94. doi:10.1007/s00418-007-0347-x
- Ciruna, B.G., Rossant, J., 1999. Expression of the T-box gene Eomesodermin during early mouse development. *Mech. Dev.* 81, 199–203.
- De Guzman Strong, C. et al., 2006. Lipid defect underlies selective skin barrier impairment of an epidermal-specific deletion of Gata-3. *J. Cell Biol.* 175, 661–70. doi:10.1083/jcb.200605057
- Debacker, C., Catala, M., Labastie, M.C., 1999. Embryonic expression of the human GATA-3 gene. *Mech. Dev.* 85, 183–7.
- Donker, R., Mouillet, J., Chu, T., Hubel, C., Stolz, D., Morelli, A., Sadovsky, Y., 2012. The expression profile of C19MC microRNAs in primary human trophoblast cells and exosomes. *MHR Basic Sci. Reprod. Med.* 18, 417–24.
- Ellis, P., Fagan, B.M., Magness, S.T., Hutton, S., Taranova, O., Hayashi, S., McMahon, A., Rao, M., Pevny, L., 2004. SOX2, a persistent marker for multipotential neural stem cells derived from embryonic stem cells, the embryo or the adult. *Dev. Neurosci.* 26, 148–65. doi:10.1159/000082134
- Fauquier, T., Rizzoti, K., Dattani, M., Lovell-Badge, R., Robinson, I.C. a F., 2008. SOX2-expressing progenitor cells generate all of the major cell types in the adult mouse pituitary gland. *Proc. Natl. Acad. Sci. U. S. A.* 105, 2907–12. doi:10.1073/pnas.0707886105
- Friedrichs, N., Steiner, S., Buettner, R., Knoepfle, G., 2007. Immunohistochemical expression patterns of AP2alpha and AP2gamma in the developing fetal human breast. *Histopathology* 51, 814–23. doi:10.1111/j.1365-2559.2007.02887.x
- George, K.M., Leonard, M.W., Roth, M.E., Liew, K.H., Kioussis, D., Grosveld, F., Engel, J.D., 1994. Embryonic expression and cloning of the murine GATA-3 gene. *Development* 120, 2673–86.
- Gordon, S.M., Chaix, J., Rupp, L.J., Wu, J., Madera, S., Sun, J.C., Lindsten, T., Reiner, S.L., 2012. The transcription factors T-bet and Eomes control key checkpoints of natural killer cell maturation. *Immunity* 36, 55–67. doi:10.1016/j.immuni.2011.11.016
- Haigh, T., Chen, C., Jones, C.J., Aplin, J.D., 1999. Studies of mesenchymal cells from 1st trimester human placenta: expression of cytokeratin outside the trophoblast lineage. *Placenta* 20, 615–25. doi:10.1053/plac.1999.0441
- Harun, R. et al., 2006. Cytotrophoblast stem cell lines derived from human embryonic stem cells and their capacity to mimic invasive implantation events. *Hum. Reprod.* 21, 1349–58.
- Hemberger, M., Udayashankar, R., Tesar, P., Moore, H., Burton, G.J., 2010. ELF5-enforced transcriptional networks define an epigenetically regulated trophoblast stem cell compartment in the human placenta. *Hum. Mol. Genet.* 19, 2456–67.

- Hiby, S.E., King, A., Sharkey, A., Loke, Y.W., 1999. Molecular studies of trophoblast HLA-G: polymorphism, isoforms, imprinting and expression in preimplantation embryo. *Tissue Antigens* 53, 1–13.
- Ho, I.-C., Tai, T.-S., Pai, S.-Y., 2009. GATA3 and the T-cell lineage: essential functions before and after T-helper-2-cell differentiation. *Nat. Rev. Immunol.* 9, 125–35. doi:10.1038/nri2476
- Jacquemin, P., Hwang, J.-J., Martial, J.A., Dollé, P., Davidson, I., 1996. A Novel Family of Developmentally Regulated Mammalian Transcription Factors Containing the TEA/ATTS DNA Binding Domain. *J. Biol. Chem.* 271, 21775–21785. doi:10.1074/jbc.271.36.21775
- Juriscova, A., Casper, R.F., MacLusky, N.J., Mills, G.B., Librach, C.L., 1996. HLA-G expression during preimplantation human embryo development. *Proc. Natl. Acad. Sci. U. S. A.* 93, 161–5.
- Kaufman, C.K., Zhou, P., Pasolli, H.A., Rendl, M., Bolotin, D., Lim, K.-C., Dai, X., Alegre, M.-L., Fuchs, E., 2003. GATA-3: an unexpected regulator of cell lineage determination in skin. *Genes Dev.* 17, 2108–22. doi:10.1101/gad.1115203
- Kelberman, D. et al., 2008. SOX2 plays a critical role in the pituitary, forebrain, and eye during human embryonic development. *J. Clin. Endocrinol. Metab.* 93, 1865–73. doi:10.1210/jc.2007-2337
- Kohler, P.O., Bridson, W.E., 1971. Isolation of hormone-producing clonal lines of human choriocarcinoma. *J. Clin. Endocrinol. Metab.* 32, 683–7.
- Kohler, P.O., Bridson, W.E., Hammond, J.M., Weintraub, B., Kirschner, M.A., Van Thiel, D.H., 1971. Clonal lines of human choriocarcinoma cells in culture. *Acta Endocrinol. Suppl.* 153, 137–53.
- Kouros-Mehr, H., Slorach, E.M., Sternlicht, M.D., Werb, Z., 2006. GATA-3 maintains the differentiation of the luminal cell fate in the mammary gland. *Cell* 127, 1041–55. doi:10.1016/j.cell.2006.09.048
- Kuckenberger, P. et al., 2010. The transcription factor TCFAP2C/AP-2gamma cooperates with CDX2 to maintain trophectoderm formation. *Mol. Cell. Biol.* 30, 3310–3320. doi:10.1128/MCB.01215-09
- Labastie, M.-C., Catala, M., Gregoire, J.-M., Peault, B., 1995. The GATA-3 gene is expressed during human kidney embryogenesis. *Kidney Int.* 47, 1597–603.
- Lantelme, E., Mantovani, S., Palermo, B., Campanelli, R., Sallusto, F., Giachino, C., 2001. Kinetics of GATA-3 gene expression in early polarizing and committed human T cells. *Immunology* 102, 123–30.
- Lapinskas, E.J., Palmer, J., Ricardo, S., Hertzog, P.J., Hammacher, A., Pritchard, M. a, 2004. A major site of expression of the ets transcription factor Elf5 is epithelia of exocrine glands. *Histochem. Cell Biol.* 122, 521–6. doi:10.1007/s00418-004-0713-x
- Laurent, L.C., Chen, J., Ulitsky, I., Mueller, F.-J., Lu, C., Shamir, R., Fan, J.-B., Loring, J.F., 2008. Comprehensive microRNA profiling reveals a unique human embryonic stem cell signature dominated by a single seed sequence. *Stem Cells* 26, 1506–16. doi:10.1634/stemcells.2007-1081
- Lawoko-Kerali, G., Rivolta, M.N., Lawlor, P., Cacciabue-Rivolta, D.I., Langton-Hewer, C., van Doorninck, J.H., Holley, M.C., 2004. GATA3 and NeuroD distinguish auditory and vestibular neurons during development of the mammalian inner ear. *Mech. Dev.* 121, 287–99. doi:10.1016/j.mod.2003.12.006
- Levenberg, S., Golub, J.S., Amit, M., Itskovitz-Eldor†, J., Langer, R., 2002. Endothelial cells derived from human embryonic stem cells. *Proc. Natl. Acad. Sci. U. S. A.* 99, 4391–4396.
- Loke, Y.W., King, A., Burrows, T., Gardner, L., Bowen, M., Hiby, S., Howlett, S., Holmes, N., Jacobs, 1997. Evaluation of trophoblast HLA-G antigen with a specific monoclonal antibody. *Tissue Antigens* 50, 135–146.

- McLane, L.M., Banerjee, P.P., Cosma, G.L., Makedonas, G., Wherry, E.J., Orange, J.S., Betts, M.R., 2013. Differential localization of T-bet and Eomes in CD8 T cell memory populations. *J. Immunol.* 190, 3207–15. doi:10.4049/jimmunol.1201556
- Metzger, D.E., Xu, Y., Shannon, J.M., 2007. Elf5 is an epithelium-specific, fibroblast growth factor-sensitive transcription factor in the embryonic lung. *Dev. Dyn.* 236, 1175–92. doi:10.1002/dvdy.21133
- Mitchell, P.J., Timmons, P.M., Hebert, J.M., Rigby, P.W., Tjian, R., 1991. Transcription factor AP-2 is expressed in neural crest cell lineages during mouse embryogenesis. *Genes Dev.* 5, 105–119. doi:10.1101/gad.5.1.105
- Mizuno, Y., Gotoh, A., Kamidono, S., Kitazawa, S., 1993. Establishment and characterization of a new human testicular germ cell tumor cell line (TCam-2). *Japanese J. Urol.* 84, 1211–8.
- Moskaluk, C. a, Zhang, H., Powell, S.M., Cerilli, L.A., Hampton, G.M., Frierson, H.F., 2003. Cdx2 protein expression in normal and malignant human tissues: an immunohistochemical survey using tissue microarrays. *Mod. Pathol.* 16, 913–9. doi:10.1097/01.MP.0000086073.92773.55
- Muhlhauser, J., Crescimanno, C., Kasper, M., Zaccheo, D., Castellucci, M., 1995. Differentiation of human trophoblast populations involves alterations in cytokeratin patterns. *J. Histochem. Cytochem.* 43, 579–589. doi:10.1177/43.6.7539466
- Niakan, K.K., Eggen, K., 2012. Analysis of human embryos from zygote to blastocyst reveals distinct gene expression patterns relative to the mouse. *Dev. Biol.* 375, 1–11. doi:10.1016/j.ydbio.2012.12.008
- Oakes, S.R. et al., 2008. The Ets transcription factor Elf5 specifies mammary alveolar cell fate. *Genes Dev.* 22, 581–6. doi:10.1101/gad.1614608
- Oettgen, P. et al., 1999. Characterization of ESE-2, a novel ESE-1-related Ets transcription factor that is restricted to glandular epithelium and differentiated keratinocytes. *J. Biol. Chem.* 274, 29439–29452.
- Okubo, T., Pevny, L.H., Hogan, B.L.M., 2006. Sox2 is required for development of taste bud sensory cells. *Genes Dev.* 20, 2654–2659. doi:10.1101/gad.1457106.2654
- Oyama, N., Takahashi, H., Tojo, M., Iwatsuki, K., Iizuka, H., Nakamura, K., Homma, Y., Kaneko, F., 2002. Different properties of three isoforms (alpha, beta, and gamma) of transcription factor AP-2 in the expression of human keratinocyte genes. *Arch. Dermatol. Res.* 294, 273–80. doi:10.1007/s00403-002-0327-x
- Pattillo, R., Ruckert, A., Hussa, R., Bernstein, R., Delfs, E., 1971. The JAR cell line - continuous human multihormone production and controls. *In Vitro* 6, 398–9.
- Pera, M., Cooper, S., Mills, J., Parrington, J., 1989. Isolation and characterization of a multipotent clone of human embryonal carcinoma cells. *Differentiation* 42, 10–23.
- Que, J., Luo, X., Schwartz, R.J., Hogan, B.L.M., 2009. Multiple roles for Sox2 in the developing and adult mouse trachea. *Development* 136, 1899–907. doi:10.1242/dev.034629
- Ramaekers, F., Huysmans, A., Schaart, G., Moesker, O., Vooijs, P., 1987. Tissue distribution of keratin 7 as monitored by a monoclonal antibody. *Exp. Cell Res.* 170, 235–249.
- Ren, J., Jin, P., Wang, E., Marincola, F.M., Stroncek, D.F., 2009. MicroRNA and gene expression patterns in the differentiation of human embryonic stem cells. *J. Transl. Med.* 7, 20. doi:10.1186/1479-5876-7-20
- Ribas, R., Moncaut, N., Siligan, C., Taylor, K., Cross, J.W., Rigby, P.W.J., Carvajal, J.J., 2011. Members of the TEAD family of transcription factors regulate the expression of Myf5 in ventral somitic compartments. *Dev. Biol.* 355, 372–80. doi:10.1016/j.ydbio.2011.04.005

- Sabir, H.J., Nehlin, J.O., Qanie, D., Harkness, L., Prokhorova, T. a, Blagoev, B., Kassem, M., Isa, A., Barington, T., 2013. Separate developmental programs for HLA-A and -B cell surface expression during differentiation from embryonic stem cells to lymphocytes, adipocytes and osteoblasts. *PLoS One* 8, e54366. doi:10.1371/journal.pone.0054366
- Schneider, C.A., Rasband, W.S., Eliceiri, K.W., 2012. NIH Image to ImageJ: 25 years of image analysis. *Nat. Methods* 9, 671–675. doi:10.1038/nmeth.2089
- Sellheyer, K., Krahl, D., 2010. Expression pattern of GATA-3 in embryonic and fetal human skin suggests a role in epidermal and follicular morphogenesis. *J. Cutan. Pathol.* 37, 357–61. doi:10.1111/j.1600-0560.2009.01416.x
- Silberg, D.G., Swain, G.P., Suh, E.R., Traber, P.G., 2000. Cdx1 and Cdx2 expression during intestinal development. *Gastroenterology* 119, 961–971. doi:10.1053/gast.2000.18142
- Smith, E., Hargrave, M., Yamada, T., Begley, C.G., Little, M.H., 2002. Coexpression of SCL and GATA3 in the V2 interneurons of the developing mouse spinal cord. *Dev. Dyn.* 224, 231–7. doi:10.1002/dvdy.10093
- Smith, F.J., Porter, R.M., Corden, L.D., Lunny, D.P., Lane, E.B., McLean, W.H.I., 2002. Cloning of human, murine, and marsupial keratin 7 and a survey of K7 expression in the mouse. *Biochem. Biophys. Res. Commun.* 297, 818–27.
- Stewart, A.F.R., Richard, C.W., Suzowa, J., Stephan, D., Weremowicze, S., Morton, C.C., Adra, C.N., 1996. Cloning of human RTEF-1, a transcriptional enhancer factor-1-related gene preferentially expressed in skeletal muscle: evidence for an ancient multigene family. *Genomics* 37, 68–76.
- Suh, E., Chen, L., Taylor, J., Traber, P.G., 1994. A homeodomain protein related to caudal regulates intestine-specific gene transcription. *Mol. Cell. Biol.* 14, 7340–51.
- Taylor-Papadimitriou, J., Stampfer, M., Bartek, J., Lewis, A., Boshell, M., Lane, E.B., Leigh, I.M., 1989. Keratin expression in human mammary epithelial cells cultured from normal and malignant tissue: relation to in vivo phenotypes and influence of medium. *J. Cell Sci.* 94, 403–13.
- Teshima, S., Shimosato, Y., Hirohashi, S., Tome, Y., Hayashi, I., Kanazawa, H., Kakizoe, T., 1988. Four new human germ cell tumor cell lines. *Lab. Investig.* 59, 328–36.
- Thomson, J.A., Itskovitz-Eldor, J., Shapiro, S.S., Waknitz, M.A., Swiergiel, J.J., Marshall, V.S., Jones, J.M., 1998. Embryonic stem Cell lines derived from human blastocysts. *Science* (80- ). 282, 1145–1147. doi:10.1126/science.282.5391.1145
- Udayashankar, R., Baker, D., Tuckerman, E., Laird, S., Li, T.C., Moore, H.D., 2011. Characterization of invasive trophoblasts generated from human embryonic stem cells. *Hum. Reprod.* 26, 398–406. doi:10.1093/humrep/deq350
- Usary, J. et al., 2004. Mutation of GATA3 in human breast tumors. *Oncogene* 23, 7669–78. doi:10.1038/sj.onc.1207966
- Verloes, A. et al., 2011. HLA-G expression in human embryonic stem cells and preimplantation embryos. *J. Immunol.* 186, 2663–71. doi:10.4049/jimmunol.1001081
- Vogelzang, N.J., Bronson, D., Savino, D., Vessella, R.L., Fraley, E.F., 1985. A human embryonal-yolk sac carcinoma model system in athymic mice. *Cancer* 55, 2584–93.
- Weber, S. et al., 2010. Critical function of AP-2 gamma/TCFAP2C in mouse embryonic germ cell maintenance. *Biol. Reprod.* 82, 214–23. doi:10.1095/biolreprod.109.078717

- Wood, H.B., Episkopou, V., 1999. Comparative expression of the mouse Sox1, Sox2 and Sox3 genes from pre-gastrulation to early somite stages. *Mech. Dev.* 86, 197–201.
- Xiao, W., Hong, H., Awadallah, A., Zhou, L., Xin, W., 2014. Utilization of CDX2 expression in diagnosing pancreatic ductal adenocarcinoma and predicting prognosis. *PLoS One* 9, e86853. doi:10.1371/journal.pone.0086853
- Yao, Y.Q., Barlow, D.H., Sargent, I.L., 2005. Differential expression of alternatively spliced transcripts of HLA-G in human preimplantation embryos and inner cell masses. *J. Immunol.* 175, 8379–85.
- Zhao, M. et al., 2007. Evidence for the presence of stem cell-like progenitor cells in human adult pancreas. *J. Endocrinol.* 195, 407–14. doi:10.1677/JOE-07-0436
